# Supplementary material for: Efficacy of 2 Commercial Formulations of Bacillus thuringiensis H-14 in Larvae of Anopheles albimanus W and Aedes aegypti L (Diptera: culicidae).
Source: Preprints.org preprint supplement (doi:10.20944/preprints202010.0570.v1), 2020-10-28
Supplement: Supplementary file 2 [file supplementary]

## Sheet: Anopheles albimanus
	Calculation of LDs and their potency ratio by probit-logdose regression (Lei and Sun, 2018,BMC Pharmacology & Toxicology)
	Sample 1:		Bactimos-Anopheles					Samlpe 1:		Bactimos-Anopheles															Samlpe 1:		Bactimos-Anopheles															Samlpe 1:		Bactimos-Anopheles
	Empirical data							1st iteration:																	2nd iteration:																	3rd iteration:
i	dose	n	r	p*	p0	y0		j=1	x	Y	P	z	y	w	nw	nwx	nwy	nw(x-`x)2	nw(y-ȳ)2	nw(x-`x)(y-ȳ)	χ2	Residual	Std. Res		j=1	x	Y	P	z	y	w	nw	nwx	nwy	nw(x-`x)2	nw(y-ȳ)2	nw(x-`x)(y-ȳ)	χ2	Residual	Std. Res		j=1	x	Y	P	z	y	w	nw
C	0	20	0	0	-	-			-																	-																	-
1	0.055	20	2	0.1	0.1	-1.28155			-1.25964	-1.39101	0.0821119	0.151619	-1.27302	0.305007	6.10014	-7.68396	-7.76563	12.448	11.3076	11.8641	0.0849103	0.357761	0.291394			-1.25964	-1.49397	0.0675914	0.130692	-1.24599	0.271017	5.42035	-6.82767	-6.75373	10.8404	9.49517	10.1455	0.333313	0.648172	0.577333			-1.25964	-1.50513	0.066145	0.128523	-1.24172	0.267413	5.34826
2	0.099	20	2	0.1	0.1	-1.28155			-1.00436	-1.13703	0.127763	0.209014	-1.26986	0.392021	7.84042	-7.87464	-9.95622	10.7921	14.466	12.4947	0.138334	-0.555264	-0.371933			-1.00436	-1.21119	0.112911	0.191584	-1.27858	0.366449	7.32898	-7.36097	-9.3707	9.84351	13.4786	11.5186	0.0332855	-0.258223	-0.182443			-1.00436	-1.21945	0.111337	0.189671	-1.27922	0.363601	7.27201
3	0.495	20	7	0.35	0.35	-0.38532			-0.305395	-0.441607	0.329387	0.361878	-0.384645	0.592853	11.8571	-3.62109	-4.56076	2.66691	2.65406	2.66048	0.0384713	0.412261	0.196141			-0.305395	-0.436897	0.331093	0.362628	-0.384758	0.593754	11.8751	-3.62659	-4.56904	2.51222	2.53802	2.52508	0.0322823	0.378142	0.179673			-0.305395	-0.437201	0.330983	0.36258	-0.384751	0.593696	11.8739
4	0.99	20	9	0.45	0.45	-0.125661			-0.00436481	-0.142105	0.443499	0.394934	-0.125643	0.631963	12.6393	-0.0551679	-1.58803	0.379283	0.579436	0.468796	0.00342519	0.130028	0.0585251			-0.00436481	-0.103427	0.458812	0.396814	-0.125634	0.634149	12.683	-0.0553588	-1.59341	0.320315	0.523586	0.409527	0.00625444	-0.176238	-0.079085			-0.00436481	-0.100306	0.460051	0.39694	-0.125626	0.634296	12.6859
5	2.52	20	11	0.55	0.55	0.125661			0.401401	0.261601	0.603185	0.385522	0.123644	0.620956	12.4191	4.98504	1.53555	0.67154	0.0153656	0.10158	0.236361	-1.06371	-0.48617			0.401401	0.346065	0.635353	0.375755	0.118914	0.609426	12.1885	4.89248	1.44938	0.74268	0.0208571	0.124459	0.628897	-1.70706	-0.79303			0.401401	0.353802	0.638256	0.374739	0.118288	0.60822	12.1644
6	5.04	20	15	0.75	0.75	0.67449			0.702431	0.561103	0.712636	0.340835	0.670727	0.567268	11.3454	7.96933	7.60964	3.22995	3.84635	3.5247	0.136343	0.747276	0.369246			0.702431	0.679535	0.7516	0.316693	0.674481	0.537204	10.7441	7.54697	7.24668	3.22503	3.82844	3.5138	0.000274396	-0.032009	-0.0165649			0.702431	0.690697	0.755122	0.31428	0.674399	0.534155	10.6831
7	9.99	20	16	0.8	0.8	0.841621			0.999565	0.856729	0.804203	0.276393	0.841524	0.485157	9.70314	9.69892	8.16542	6.69579	5.50256	6.06993	0.00224345	-0.0840541	-0.0473651			0.999565	1.00869	0.843438	0.239868	0.827597	0.435719	8.71437	8.71058	7.21199	6.22244	4.90249	5.52317	0.285784	-0.868767	-0.534587			0.999565	1.02323	0.846901	0.23635	0.824794	0.430831	8.61662
8	19.8	20	20	1	1				1.29667	1.15232	0.875405	0.205387	1.75895	0.386756	7.73511	10.0299	13.6057	9.83856	21.585	14.5728	2.84656	2.49189	1.68717			1.29667	1.33781	0.90952	0.163033	1.89278	0.322989	6.45979	8.37618	12.227	8.42625	21.2855	13.3924	1.98962	1.8096	1.41054			1.29667	1.35573	0.912407	0.159145	1.90612	0.316905	6.33811
9
10
								Sum							79.6396	13.4483	7.04568	46.7222	59.9564	51.7571	3.48665				Sum							75.4142	11.6556	5.84816	42.1328	56.0727	47.1525	3.30971				Sum							74.9823
								Mean	0.168864				0.0884696												Mean	0.154555				0.0775472												Mean	0.153316				0.0763648
	Provisional regression line:							Working probit regression line:																	Working probit regression line:																	Working probit regression line:
	β0	α0	R2	F	d.f.Res	p for F		β	α	σ(β)	σ(α)	z for β	z for α	d.f.	p for χ2	h	g		This is a reference toxicant or population.						β	α	σ(β)	σ(α)	z for β	z for α	d.f.	p for χ2	h	g		This is a reference toxicant or population.						β	α	σ(β)	σ(α)	z for β	z for α	d.f.	p for χ2
	0.994924	-0.137762	0.984344	12.5744	5	0.0164566		1.10776	-0.0985921	0.146298	0.114747	7.57196	-0.859213	6	0.745745	0.581108	0.0670031								1.11914	-0.0954214	0.15406	0.117589	7.26432	-0.811486	6	0.769091	0.551618	0.0727985								1.11945	-0.0952644	0.154925	0.117901	7.22573	-0.808003	6	0.760547
															LDπ:																	LDπ:																	LDπ:
															Bactimos-Anopheles																	Bactimos-Anopheles																	Bactimos-Anopheles
												95%CL	of θ1			95%CLs	of LDπ1												95%CL	of θ1			95%CLs	of LDπ1												95%CL	of θ1
								π	yπ	θ1	σ(θ1)	Lower	Upper	π	LDπ1	Lower	Upper								π	yπ	θ1	σ(θ1)	Lower	Upper	π	LDπ1	Lower	Upper								π	yπ	θ1	σ(θ1)	Lower	Upper	π	LDπ1
								10	-1.28155	-1.06788	0.192119	-1.53798	-0.597782	10	0.0855301	0.0289748	0.252475								10	-1.28155	-1.05986	0.196302	-1.54019	-0.579523	10	0.0871248	0.0288275	0.263316								10	-1.28155	-1.05971	0.197039	-1.54185	-0.57757	10	0.087155
								50	0	0.0890011	0.101704	-0.159859	0.337861	50	1.22744	0.692056	2.17701								50	0	0.0852631	0.103335	-0.167588	0.338115	50	1.21692	0.679848	2.17828								50	0	0.0850994	0.103592	-0.168382	0.338581	50	1.21646
								90	1.28155	1.24588	0.174539	0.818801	1.67297	90	17.615	6.58872	47.094								90	1.28155	1.23038	0.180333	0.789125	1.67164	90	16.9975	6.15354	46.9509								90	1.28155	1.22991	0.181222	0.786472	1.67334	90	16.9788
								99	2.32635	2.18904	0.28533	1.49086	2.88722	99	154.54	30.9645	771.29								99	2.32635	2.16395	0.29513	1.4418	2.88611	99	145.866	27.6566	769.326								99	2.32635	2.16322	0.296673	1.43729	2.88915	99	145.62
	Sample 2:		Vectobac-Anopheles					Samlpe 2:		Vectobac-Anopheles															Samlpe 2:		Vectobac-Anopheles															Samlpe 2:		Vectobac-Anopheles
	Empirical data							1st iteration:																	2nd iteration:																	3rd iteration:
i	dose	n	r	p*	p0	y0		j=2	x	Y	P	z	y	w	nw	nwx	nwy	nw(x-`x)2	nw(y-ȳ)2	nw(x-`x)(y-ȳ)	χ2	Residual	Std. Res		j=2	x	Y	P	z	y	w	nwx	nwy	nwx	nw(x-`x)2	nw(y-ȳ)2	nw(x-`x)(y-ȳ)	χ2	Residual	Std. Res		j=2	x	Y	P	z	y	w	nw
C	0	20	0	0	-	-			-																	-																	-
1	0.055	20	2	0.1	0.1	-1.28155			-1.25964	-1.30348	0.0962048	0.170593	-1.28124	0.334701	6.69401	-8.43203	-8.57662	10.4978	15.1198	12.5986	0.00331301	0.0759031	0.0575587			-1.25964	-1.32868	0.0919775	0.16503	-1.28006	0.326097	6.52195	-8.21529	-8.34851	10.1179	14.5511	12.1337	0.0154126	0.160451	0.124148			-1.25964	-1.32973	0.0918028	0.164798	-1.27999	0.325737	6.51473
2	0.099	20	3	0.15	0.15	-1.03643			-1.00436	-0.994755	0.159928	0.24324	-1.03557	0.440382	8.80763	-8.84607	-9.12091	8.75521	13.9216	11.0402	0.0146721	-0.198555	-0.121128			-1.00436	-1.01265	0.155614	0.23891	-1.03615	0.43439	8.6878	-8.72572	-9.00184	8.51943	13.5696	10.752	0.00479702	-0.112278	-0.0692605			-1.00436	-1.01342	0.155429	0.238723	-1.03617	0.43413	8.6826
3	0.495	20	9	0.45	0.45	-0.125661			-0.305395	-0.149414	0.440613	0.394514	-0.125621	0.631473	12.6295	-3.85697	-1.58653	1.12192	1.52316	1.30724	0.00714964	0.187734	0.0845556			-0.305395	-0.147326	0.441438	0.394636	-0.125628	0.631616	12.6323	-3.85784	-1.58698	1.07187	1.45385	1.24833	0.00594683	0.171249	0.0771157			-0.305395	-0.147323	0.441438	0.394636	-0.125628	0.631616	12.6323
4	0.99	20	12	0.6	0.6	0.253347			-0.00436481	0.214654	0.584981	0.389856	0.253177	0.626037	12.5207	-0.0546506	3.16997	0.000111202	0.0124376	0.00117605	0.0185814	0.300372	0.136314			-0.00436481	0.225349	0.589146	0.38894	0.253255	0.624964	12.4993	-0.054557	3.16551	0.00118522	0.0196357	0.00482419	0.00973395	0.217077	0.0986608			-0.00436481	0.225686	0.589277	0.388911	0.253257	0.62493	12.4986
5	2.52	20	16	0.8	0.8	0.841621			0.401401	0.70539	0.759716	0.311073	0.834889	0.530091	10.6018	4.25557	8.85134	1.77128	3.98682	2.6574	0.177793	0.805675	0.421655			0.401401	0.727686	0.766597	0.306143	0.836795	0.523813	10.4763	4.20518	8.76648	1.80865	4.06842	2.71263	0.124717	0.66806	0.353153			0.401401	0.728474	0.766838	0.305968	0.836857	0.523588	10.4718
6	5.04	20	15	0.75	0.75	0.67449			0.702431	1.06946	0.857568	0.22519	0.591781	0.415169	8.30337	5.83254	4.91378	4.18308	1.13748	2.18132	1.89463	-2.15137	-1.37646			0.702431	1.10036	0.864412	0.217766	0.574968	0.404612	8.09224	5.68423	4.65278	4.15471	1.05662	2.09523	2.23375	-2.28825	-1.49458			0.702431	1.10148	0.864657	0.217497	0.574317	0.404227	8.08454
7	9.99	20	19	0.95	0.95	1.64485			0.999565	1.42882	0.923471	0.143748	1.61337	0.292384	5.84769	5.84515	9.43446	5.92879	11.3261	8.1945	0.199164	0.530571	0.446278			0.999565	1.46821	0.928977	0.135774	1.62305	0.279401	5.58803	5.5856	9.06966	5.74183	11.1006	7.9836	0.133975	0.420464	0.366026			0.999565	1.46967	0.929174	0.135484	1.62338	0.278926	5.57852
8	19.8	20	20	1	1				1.29667	1.78813	0.963123	0.0806493	2.24539	0.18313	3.6626	4.74916	8.22395	6.22804	15.0001	9.66546	0.765789	0.737549	0.875094			1.29667	1.83602	0.966823	0.0739455	2.28469	0.170466	3.40931	4.42074	7.78924	5.85758	14.6237	9.25525	0.686314	0.663544	0.828441			1.29667	1.83781	0.966954	0.0737036	2.28616	0.170004	3.40008
9
10
								Sum							69.0673	-0.507298	15.3094	38.4862	62.0274	47.6459	3.08109				Sum	-0.7666						67.9072	-0.957663	14.5063	37.2731	60.4435	46.1855	3.21465				Sum	-0.793923						67.8631
								Mean	-0.00734498				0.22166												Mean	-0.0141025				0.21362												Mean	-0.0143235				0.21335
	Provisional regression line:					6		Working probit regression line:																	Working probit regression line:																	Working probit regression line:
	β0	α0	R2	F	d.f.Res	p for F		β	α	σ(β)	σ(α)	z for β	z for α	d.f.	p for χ2	h	g		z of b12	Parallel of	Bactimos-Anopheles	vs	Vectobac-Anopheles		β	α	σ(β)	σ(α)	z for β	z for α	d.f.	p for χ2	h	g		z of b12	Parallel of	Bactimos-Anopheles	vs	Vectobac-Anopheles		β	α	σ(β)	σ(α)	z for β	z for α	d.f.	p for χ2
	1.20941	0.219933	0.965469	5.59196	5	0.0643719		1.238	0.230753	0.161193	0.120333	7.6802	1.91762	6	0.798602	0.513515	0.0651279		0.598273	Yes					1.23911	0.231095	0.163796	0.121373	7.56498	1.90401	6	0.781464	0.535775	0.0671269		0.533523	Yes					1.23913	0.231099	0.163898	0.121413	7.56035	1.90342	6	0.780628
															LDπ:				Comparison of LDπs:													LDπ:				Comparison of LDπs:													LDπ:
															Vectobac-Anopheles					Bactimos-Anopheles	vs	Vectobac-Anopheles										Vectobac-Anopheles					Bactimos-Anopheles	vs	Vectobac-Anopheles										Vectobac-Anopheles
												95%CLs	of θ2			95%CLs	of LDπ2					95%CLs	of ratio12						95%CLs	of θ2			95%CLs	of LDπ2					95%CLs	of ratio12						95%CLs	of θ2
								π	yπ	θ2	σ(θ2)	Lower	Upper	π	LDπ2	Lower	Upper		θ12	σ(θ12)	Ratio12	Lower	Upper		π	yπ	θ2	σ(θ2)	Lower	Upper	π	LDπ2	Lower	Upper		θ12	σ(θ12)	Ratio12	Lower	Upper		π	yπ	θ2	σ(θ2)	Lower	Upper	π	LDπ2
								10	-1.28155	-1.22157	0.185585	-1.67568	-0.767461	10	0.0600382	0.0211017	0.17082		0.153691	0.267117	1.4246	0.426718	4.756		10	-1.28155	-1.22075	0.18717	-1.67874	-0.762763	10	0.0601517	0.0209536	0.172678		0.160894	0.271233	1.44842	0.42587	4.92618		10	-1.28155	-1.22074	0.187243	-1.67891	-0.762571	10	0.0601537
								50	0	-0.186392	0.0999517	-0.430965	0.0581813	50	0.651041	0.370711	1.14336		0.275393	0.142597	1.88535	0.990609	3.58826		50	0	-0.186501	0.10055	-0.432538	0.059537	50	0.650878	0.36937	1.14693		0.271764	0.144182	1.86966	0.975364	3.58394		50	0	-0.186501	0.100576	-0.432603	0.0596003	50	0.650877
								90	1.28155	0.848789	0.147895	0.486902	1.21068	90	7.05974	3.06833	16.2434		0.397094	0.228773	2.49514	0.888586	7.0063		90	1.28155	0.847751	0.150234	0.480141	1.21536	90	7.04289	3.02093	16.4195		0.382633	0.234713	2.41342	0.836749	6.961		90	1.28155	0.847735	0.150328	0.479897	1.21557	90	7.04264
								99	2.32635	1.69273	0.241757	1.10117	2.28429	99	49.2866	12.6233	192.436		0.496312	0.373978	3.13554	0.579851	16.9554		99	2.32635	1.69093	0.245743	1.08962	2.29224	99	49.0833	12.292	195.995		0.473021	0.384046	2.97181	0.52516	16.8171		99	2.32635	1.69091	0.245905	1.0892	2.29261	99	49.0802
	Samlpe 4:		Rotenone					Samlpe 4:		Rotenone															Samlpe 4:		Rotenone															Samlpe 4:		Rotenone
	Empirical data							1st iteration:																	2nd iteration:																	3rd iteration:
i	dose	n	r	p*	p0	y0		j=4	x	Y	P	z	y	w	nw	nwx	nwy	nw(x-`x)2	nw(y-ȳ)2	nw(x-`x)(y-ȳ)	χ2	Residual	Std. Res		j=4	x	Y	P	z	y	w	nw	nwx	nwy	nw(x-`x)2	nw(y-ȳ)2	nw(x-`x)(y-ȳ)	χ2	Residual	Std. Res		j=4	x	Y	P	z	y	w	nw
C	0	50	0	0	-	-			-																	-																	-
1	2.6	50	6	0.12	0.12	-1.17499			0.414973	-1.13399	0.128399	0.209736	-1.17404	0.393066	19.6533	8.1556	-23.0737	1.65777	31.132	-10.2646	0.0315198	-0.419968	-0.177538			0.414973	-1.13916	0.127318	0.208507	-1.17426	0.391287	19.5643	8.11867	-22.9736	1.64172	30.8454	-10.1941	0.0240971	-0.365881	-0.155232			0.414973	-1.1391	0.127331	0.208522	-1.17426	0.391309	19.5654
2	3.8	48	16	0.333333	0.333333	-0.430727			0.579784	-0.445403	0.328014	0.36127	-0.43068	0.592121	28.4218	16.4785	-12.2407	0.448518	7.54508	-8.49031	0.00616088	0.25531	0.0784912			0.579784	-0.444744	0.328252	0.361376	-0.430684	0.592248	28.4279	16.482	-12.2435	0.443253	7.45391	-8.43977	0.00561952	0.243881	0.0749634			0.579784	-0.444721	0.328261	0.361379	-0.430684	0.592253	28.4281
3	5.1	46	24	0.521739	0.521739	0.0545189			0.70757	0.0884974	0.535259	0.397383	0.0544743	0.63481	29.2013	20.6619	1.59072	0.000136869	0.0264248	-0.621551	0.0338025	-0.621929	-0.183855			0.70757	0.0936782	0.537318	0.397196	0.054457	0.634592	29.1913	20.6549	1.58967	0.000248559	0.0211507	-0.555978	0.0449049	-0.71661	-0.211908			0.70757	0.0936688	0.537314	0.397196	0.0544571	0.634593	29.1913
4	7.7	49	42	0.857143	0.857143	1.06757			0.886491	0.836038	0.798433	0.281276	1.04476	0.491596	24.0882	21.354	25.1665	0.789899	22.2093	20.5042	1.04944	2.87677	1.02442			0.886491	0.84755	0.801656	0.278563	1.04674	0.488024	23.9132	21.1988	25.0309	0.790695	22.2854	20.4646	0.948795	2.71887	0.974061			0.886491	0.847496	0.801641	0.278576	1.04673	0.488041	23.914
5	10.2	50	44	0.88	0.88	1.17499			1.0086	1.34622	0.910884	0.161203	1.15463	0.320131	16.0065	16.1442	18.4817	1.47144	18.3285	17.2755	0.587517	-1.5442	-0.766497			1.0086	1.36205	0.913409	0.157784	1.15031	0.314765	15.7382	15.8736	18.1039	1.45397	17.9829	16.9679	0.705613	-1.67046	-0.840008			1.0086	1.36197	0.913396	0.157802	1.15034	0.314794	15.7397
6
7
8
9
10
								Sum							117.371	82.7942	9.92446	4.36776	79.2413	18.4033	1.70844				Sum	-1.37506						116.835	82.328	9.50739	4.32988	78.5888	18.2426	1.72903				Sum	-1.39588						116.839
								Mean	0.705405				0.0845562												Mean	0.704652				0.0813746												Mean	0.704654				0.0813837
	Provisional regression line:							Working probit regression line:											Comparison of two slopes:						Working probit regression line:											Comparison of two slopes:						Working probit regression line:
	β0	α0	R2	F	d.f.Res	p for F		β	α	σ(β)	σ(α)	z for β	z for α	d.f.	p for χ2	h	g		z of b14	Parallel of	Bactimos-Anopheles	vs	Rotenone		β	α	σ(β)	σ(α)	z for β	z for α	d.f.	p for χ2	h	g		z of b14	Parallel of	Bactimos-Anopheles	vs	Rotenone		β	α	σ(β)	σ(α)	z for β	z for α	d.f.	p for χ2
	4.17806	-2.86777	0.978472	15.1504	3	0.0300741		4.21345	-2.88763	0.478487	0.349921	8.80576	-8.25223	3	0.63506	0.569479	0.0495425		6.20698	No					4.21319	-2.88746	0.480576	0.351049	8.76697	-8.22524	3	0.630499	0.576343	0.0499819		6.1309	No					4.2132	-2.88746	0.480562	0.35104	8.76724	-8.22546	3	0.630534
															LDπ:				Comparison of LDπs:													LDπ:				Comparison of LDπs:													LDπ:
															Rotenone					Bactimos-Anopheles	vs	Rotenone										Rotenone					Bactimos-Anopheles	vs	Rotenone										Rotenone
												95%CLs	of θ4			95%CLs	of LDπ4					95%CLs	of ratio14						95%CLs	of θ4			95%CLs	of LDπ4					95%CLs	of ratio14						95%CLs	of θ4
								π	yπ	θ4	σ(θ4)	Lower	Upper	π	LDπ2	Lower	Upper		θ14	σ(θ14)	Ratio14	Lower	Upper		π	yπ	θ4	σ(θ4)	Lower	Upper	π	LDπ2	Lower	Upper		θ14	σ(θ14)	Ratio14	Lower	Upper		π	yπ	θ4	σ(θ4)	Lower	Upper	π	LDπ2
								10	-1.28155	0.381179	0.042844	0.244831	0.517528	10	2.40536	1.75724	3.29252		-1.44906	0.196838	0.0355582	0.0146264	0.0864456		10	-1.28155	0.381162	0.0429382	0.244514	0.517811	10	2.40526	1.75596	3.29466		-1.44102	0.200944	0.0362226	0.0146262	0.0897076		10	-1.28155	0.381162	0.0429373	0.244517	0.517808	10	2.40526
								50	0	0.685337	0.0220252	0.615243	0.755431	50	4.84548	4.12328	5.69418		-0.596336	0.104061	0.253317	0.158381	0.405158		50	0	0.685338	0.0220687	0.615105	0.75557	50	4.84549	4.12198	5.69601		-0.600075	0.105665	0.251145	0.155891	0.404603		50	0	0.685338	0.0220684	0.615106	0.755569	50	4.84549
								90	1.28155	0.989495	0.0389966	0.86539	1.1136	90	9.76101	7.33483	12.9897		0.256388	0.178843	1.80463	0.805113	4.04501		90	1.28155	0.989514	0.0392166	0.864709	1.11432	90	9.76144	7.32334	13.0112		0.240871	0.184548	1.74129	0.757105	4.00484		90	1.28155	0.989513	0.0392154	0.864713	1.11431	90	9.76143
								99	2.32635	1.23746	0.0642702	1.03293	1.442	99	17.2767	10.7876	27.6693		0.95158	0.292479	8.94498	2.38958	33.484		99	2.32635	1.2375	0.0646236	1.03183	1.44316	99	17.2781	10.7606	27.7432		0.926459	0.302122	8.44226	2.15923	33.0079		99	2.32635	1.2375	0.0646214	1.03184	1.44315	99	17.2781
[truncated: 280 more columns]

## Sheet: Aedes aegypti
	Sample 1:		Bactimo-Aedes					Samlpe 1:		Bactimo-Aedes															Samlpe 1:		Bactimo-Aedes															Samlpe 1:		Bactimo-Aedes
	Empirical data							1st iteration:																	2nd iteration:																	3rd iteration:
i	dose	n	r	p*	p0	y0		j=1	x	Y	P	z	y	w	nw	nwx	nwy	nw(x-`x)2	nw(y-ȳ)2	nw(x-`x)(y-ȳ)	χ2	Residual	Std. Res		j=1	x	Y	P	z	y	w	nw	nwx	nwy	nw(x-`x)2	nw(y-ȳ)2	nw(x-`x)(y-ȳ)	χ2	Residual	Std. Res		j=1	x	Y	P	z	y	w	nw
C	0	20	0	0	-	-			-																	-																	-
1	0.0009	20	3	0.15	0.15	-1.03643			-3.04576	-1.57066	0.0581309	0.116202	-0.780062	0.246621	4.93243	-15.023	-3.8476	12.6552	3.77744	6.91406	3.08299	1.83738	1.75584			-3.04576	-1.71128	0.0435146	0.0922567	-0.557051	0.204495	4.0899	-12.4568	-2.27828	10.1634	1.63154	4.07209	5.44875	2.12971	2.33426			-3.04576	-1.71694	0.0429955	0.0913669	-0.545784	0.202881	4.05762
2	0.005	20	3	0.15	0.15	-1.03643			-2.30103	-0.813976	0.207829	0.286443	-1.01586	0.498368	9.96735	-22.9352	-10.1255	7.32151	12.3012	9.49018	0.406258	-1.15659	-0.637384			-2.30103	-0.871449	0.191755	0.2729	-1.02445	0.480527	9.61054	-22.1141	-9.84554	6.64719	11.6077	8.78398	0.224983	-0.835092	-0.474324			-2.30103	-0.870589	0.191989	0.273104	-1.02434	0.480799	9.61597
3	0.009	20	2	0.1	0.1	-1.28155			-2.04576	-0.554605	0.289582	0.342073	-1.10882	0.568789	11.3758	-23.2721	-12.6137	4.11969	16.4873	8.24151	3.49414	-3.79165	-1.86926			-2.04576	-0.583577	0.279753	0.336479	-1.11779	0.561902	11.238	-22.9903	-12.5618	3.73351	15.9769	7.72333	3.20719	-3.59505	-1.79086			-2.04576	-0.580485	0.280794	0.337085	-1.11683	0.56265	11.253
4	0.055	20	12	0.6	0.6	0.253347			-1.25964	0.244136	0.596437	0.387229	0.253337	0.622959	12.4592	-15.694	3.15637	0.423353	0.312121	0.363507	0.00105465	0.0712535	0.0324753			-1.25964	0.302935	0.61903	0.381051	0.252993	0.615691	12.3138	-15.5109	3.11531	0.541666	0.392099	0.460854	0.0307125	-0.380604	-0.17525			-1.25964	0.312902	0.622822	0.379883	0.252824	0.614312	12.2862
5	0.099	20	16	0.8	0.8	0.841621			-1.00436	0.503507	0.692696	0.351446	0.808828	0.580239	11.6048	-11.6554	9.38628	2.24267	5.91223	3.64132	1.08181	2.14608	1.0401			-1.00436	0.590807	0.722675	0.335054	0.821591	0.56014	11.2028	-11.2517	9.20411	2.4224	6.25195	3.89162	0.596674	1.5465	0.772447			-1.00436	0.603007	0.726748	0.332622	0.823233	0.557129	11.1426
6	0.495	20	18	0.9	0.9	1.28155			-0.305395	1.2137	0.887569	0.191002	1.27878	0.365584	7.31167	-2.23295	9.35005	9.47854	10.2451	9.85439	0.0309727	0.248628	0.175991			-0.305395	1.37904	0.916059	0.154153	1.27487	0.309031	6.18062	-1.88753	7.87946	8.37376	8.90478	8.63519	0.0670725	-0.321171	-0.258983			-0.305395	1.39735	0.918846	0.150283	1.27195	0.302878	6.05757
7	0.99	20	20	1	1				-0.00436481	1.51956	0.935689	0.125748	2.03098	0.262779	5.25558	-0.0229396	10.674	10.892	19.6969	14.6471	1.37461	1.28621	1.17244			-0.00436481	1.71851	0.957148	0.0911199	2.18879	0.202432	4.04864	-0.0176715	8.86162	8.68937	18.0975	12.5402	0.895403	0.857034	0.946257			-0.00436481	1.73946	0.959023	0.087879	2.20575	0.196517	3.93033
8
9
10
								Sum							62.9068	-90.8356	5.97991	47.133	68.7323	53.1521	9.47184				Sum							58.6843	-86.2291	4.37489	40.5713	62.8624	46.1072	10.4708				Sum							58.3433
								Mean	-1.44397				0.09506												Mean	-1.46937				0.0745495												Mean	-1.47473				0.0689226
	Provisional regression line:							Working probit regression line:																	Working probit regression line:																	Working probit regression line:
	β0	α0	R2	F	d.f.Res	p for F		β	α	σ(β)	σ(α)	z for β	z for α	d.f.	p for χ2	h	g		This is a reference toxicant or population.						β	α	σ(β)	σ(α)	z for β	z for α	d.f.	p for χ2	h	g		This is a reference toxicant or population.						β	α	σ(β)	σ(α)	z for β	z for α	d.f.	p for χ2
	1.01605	1.524	0.837528	1.28873	4	0.319692		1.1277	1.72343	0.145659	0.245223	7.74209	7.02803	5	0.0916607	1.89437	0.208839								1.13645	1.74442	0.156997	0.26506	7.23869	6.58123	5	0.0629432	2.09416	0.26409								1.13656	1.74504	0.157989	0.267254	7.1939	6.52951	5	0.0607345
															LDπ:																	LDπ:																	LDπ:
															Bactimo-Aedes																	Bactimo-Aedes																	Bactimo-Aedes
												95%CL	of θ1			95%CLs	of LDπ1												95%CL	of θ1			95%CLs	of LDπ1												95%CL	of θ1
								π	yπ	θ1	σ(θ1)	Lower	Upper	π	LDπ1	Lower	Upper								π	yπ	θ1	σ(θ1)	Lower	Upper	π	LDπ1	Lower	Upper								π	yπ	θ1	σ(θ1)	Lower	Upper	π	LDπ1
								10	-1.28155	-2.66469	0.19329	-3.16156	-2.16782	10	0.00216426	0.000689353	0.00679478								10	-1.28155	-2.66265	0.200919	-3.17913	-2.14617	10	0.00217446	0.000662019	0.00714218								10	-1.28155	-2.66294	0.201369	-3.18058	-2.14531	10	0.00217298
								50	0	-1.52827	0.112333	-1.81703	-1.23951	50	0.0296301	0.0152396	0.0576094								50	0	-1.53497	0.115222	-1.83116	-1.23878	50	0.0291763	0.0147517	0.0577056								50	0	-1.53537	0.115498	-1.83227	-1.23848	50	0.0291494
								90	1.28155	-0.391842	0.175978	-0.844207	0.0605231	90	0.405656	0.14315	1.14954								90	1.28155	-0.407291	0.186337	-0.886286	0.0717044	90	0.39148	0.129931	1.17952								90	1.28155	-0.407798	0.187789	-0.890525	0.0749282	90	0.391023
								99	2.32635	0.534638	0.278951	-0.182429	1.25171	99	3.42482	0.657009	17.8528								99	2.32635	0.512059	0.296852	-0.251022	1.27514	99	3.25132	0.561019	18.8426								99	2.32635	0.511465	0.29916	-0.25755	1.28048	99	3.24687
	Sample 2:		Vectobac-Aedes					Samlpe 2:		Vectobac-Aedes															Samlpe 2:		Vectobac-Aedes															Samlpe 2:		Vectobac-Aedes
	Empirical data					s		1st iteration:																	2nd iteration:																	3rd iteration:
i	dose	n	r	p*	p0	y0		j=2	x	Y	P	z	y	w	nw	nwx	nwy	nw(x-`x)2	nw(y-ȳ)2	nw(x-`x)(y-ȳ)	χ2	Residual	Std. Res		j=2	x	Y	P	z	y	w	nw	nwx	nwy	nw(x-`x)2	nw(y-ȳ)2	nw(x-`x)(y-ȳ)	χ2	Residual	Std. Res		j=2	x	Y	P	z	y	w	nw
C	0	20	0	0	-	-			-																	-																	-
1	0.0009	20	0	0	0				-3.04576	-2.66259	0.00387707	0.0115204	-2.99913	0.0343652	0.687304	-2.09336	-2.06131	2.41885	6.67949	4.01954	0.0778433	-0.0775415	-0.279004			-3.04576	-2.98837	0.00140236	0.00458893	-3.29396	0.0150374	0.300748	-0.916006	-0.990653	0.992037	3.36149	1.82612	0.0280866	-0.0280472	-0.167591			-3.04576	-3.13665	0.00085445	0.00291401	-3.42987	0.00994642	0.198928
2	0.005	20	1	0.05	0.05	-1.64485			-2.30103	-1.61349	0.0533187	0.108542	-1.64407	0.233406	4.66812	-10.7415	-7.67471	5.97403	14.4989	9.30683	0.00436405	-0.0663746	-0.066061			-2.30103	-1.75509	0.0396224	0.0855118	-1.63373	0.192163	3.84326	-8.84346	-6.27884	4.41223	10.8857	6.93038	0.0566038	0.207553	0.237915			-2.30103	-1.83028	0.0336043	0.0747284	-1.61087	0.171958	3.43915
3	0.009	20	2	0.1	0.1	-1.28155			-2.04576	-1.25389	0.104941	0.181762	-1.28107	0.351729	7.03458	-14.391	-9.01181	5.39802	13.7755	8.62325	0.00519822	-0.0988191	-0.0720987			-2.04576	-1.33235	0.0913727	0.164225	-1.27982	0.324846	6.49692	-13.2911	-8.31487	4.32808	11.4763	7.04772	0.0179301	0.172547	0.133903			-2.04576	-1.38249	0.083411	0.15342	-1.27436	0.30787	6.1574
4	0.055	20	11	0.55	0.55	0.125661			-1.25964	-0.146482	0.441771	0.394685	0.127735	0.631673	12.6335	-15.9136	1.61374	0.102032	0.00112415	-0.0107098	0.949973	2.16459	0.974666			-1.25964	-0.030521	0.487826	0.398757	0.125399	0.636404	12.7281	-16.0328	1.59609	0.0115124	0.0738053	-0.0291492	0.309434	1.24348	0.556268			-1.25964	-0.00350526	0.498602	0.39894	0.125332	0.636617	12.7323
5	0.099	20	10	0.5	0.5	0			-1.00436	0.213121	0.584384	0.389984	-0.0032562	0.626186	12.5237	-12.5784	-0.0407797	0.342631	0.185057	-0.251806	0.58635	-1.68767	-0.765735			-1.00436	0.392215	0.65255	0.369408	-0.0207444	0.601874	12.0375	-12.09	-0.24971	0.610469	0.0589752	-0.189743	2.05281	-3.051	-1.43276			-1.00436	0.444284	0.671581	0.36145	-0.0304195	0.592337	11.8467
6	0.495	20	20	1	1				-0.305395	1.19776	0.884495	0.194708	1.79098	0.371083	7.42166	-2.26654	13.2921	5.54504	20.7648	10.7304	2.61177	2.3101	1.6161			-0.305395	1.54972	0.939396	0.120061	2.0545	0.253193	5.06386	-1.54648	10.4037	4.32497	20.3619	9.38428	1.29028	1.21208	1.13591			-0.305395	1.67039	0.952579	0.0988609	2.15007	0.21636	4.3272
7	0.99	20	20	1	1				-0.00436481	1.62182	0.947579	0.107089	2.11133	0.230873	4.61747	-0.0201543	9.74898	6.27129	18.3413	10.7249	1.10641	1.04841	1.05186			-0.00436481	2.04823	0.979731	0.0489691	2.46214	0.120757	2.41514	-0.0105416	5.94641	3.62539	14.061	7.1398	0.413759	0.405373	0.643241			-0.00436481	2.19845	0.986041	0.035596	2.59059	0.0920585	1.84117
8
9
10
								Sum							49.5863	-58.0045	5.86618	26.0519	74.2461	43.1424	5.34191				Sum	-1.18352						42.8855	-52.7304	2.11214	18.3047	60.2792	32.1094	4.16891				Sum	-1.65216						40.5429
								Mean	-1.16977				0.118302												Mean	-1.22956				0.0492506												Mean	-1.24269				0.03058
	Provisional regression line:							Working probit regression line:											Comparison of two slopes:						Working probit regression line:											Comparison of two slopes:						Working probit regression line:
	β0	α0	R2	F	d.f.Res	p for F		β	α	σ(β)	σ(α)	z for β	z for α	d.f.	p for χ2	h	g		z of b12	Parallel of	Bactimo-Aedes	vs	Vectobac-Aedes		β	α	σ(β)	σ(α)	z for β	z for α	d.f.	p for χ2	h	g		z of b12	Parallel of	Bactimo-Aedes	vs	Vectobac-Aedes		β	α	σ(β)	σ(α)	z for β	z for α	d.f.	p for χ2
	1.4087	1.62797	0.949543	9.40945	2	0.0918663		1.65602	2.05546	0.195921	0.269613	8.45249	7.62374	5	0.375592	1.06838	0.0537704		2.16403	No					1.75416	2.2061	0.233732	0.325438	7.505	6.77887	5	0.525363	0.833782	0.0682041		2.19385	No					1.7696	2.22963	0.251806	0.350117	7.02761	6.36826	5	0.491425
															LDπ:				Comparison of LDπs:													LDπ:				Comparison of LDπs:													LDπ:
															Vectobac-Aedes					Bactimo-Aedes	vs	Vectobac-Aedes										Vectobac-Aedes					Bactimo-Aedes	vs	Vectobac-Aedes										Vectobac-Aedes
												95%CL	of θ2			95%CLs	of LDπ2					95%CLs	of ratio12						95%CL	of θ2			95%CLs	of LDπ2					95%CLs	of ratio12						95%CL	of θ2
								π	yπ	θ2	σ(θ2)	Lower	Upper	π	LDπ2	Lower	Upper		θ12	σ(θ12)	Ratio12	Lower	Upper		π	yπ	θ2	σ(θ2)	Lower	Upper	π	LDπ2	Lower	Upper		θ12	σ(θ12)	Ratio12	Lower	Upper		π	yπ	θ2	σ(θ2)	Lower	Upper	π	LDπ2
								10	-1.28155	-2.01508	0.131739	-2.35373	-1.67644	10	0.00965867	0.00442864	0.0210651		-0.649609	0.233915	0.224074	0.0779683	0.643968		10	-1.28155	-1.98822	0.133403	-2.33114	-1.64529	10	0.010275	0.00466509	0.0226312		-0.674433	0.241174	0.211625	0.0712633	0.628447		10	-1.28155	-1.98417	0.137873	-2.33859	-1.62976	10	0.0103712
								50	0	-1.24121	0.0861695	-1.46271	-1.0197	50	0.0573843	0.0344578	0.095565		-0.28706	0.141576	0.516345	0.272553	0.978203		50	0	-1.25764	0.0871316	-1.48162	-1.03366	50	0.0552536	0.03299	0.0925422		-0.277331	0.144458	0.528043	0.275126	1.01346		50	0	-1.25997	0.088784	-1.48819	-1.03174	50	0.0549583
								90	1.28155	-0.467331	0.119415	-0.774299	-0.160364	90	0.340933	0.168152	0.691251		0.0754892	0.212669	1.18984	0.455677	3.10686		90	1.28155	-0.527062	0.127827	-0.855651	-0.198472	90	0.297124	0.139428	0.633181		0.119771	0.225967	1.31756	0.475198	3.65314		90	1.28155	-0.535761	0.134147	-0.880597	-0.190926	90	0.291232
								99	2.32635	0.163578	0.179548	-0.297966	0.625121	99	1.4574	0.50354	4.21814		0.371061	0.33174	2.34996	0.525836	10.502		99	2.32635	0.0685483	0.193637	-0.429211	0.566307	99	1.17098	0.372211	3.68389		0.443511	0.354424	2.77659	0.560842	13.7462		99	2.32635	0.0546539	0.204832	-0.471882	0.58119	99	1.13411
	Samlpe 4:		Fairfax					Samlpe 4:		Fairfax															Samlpe 4:		Fairfax															Samlpe 4:		Fairfax
	Empirical data							1st iteration:																	2nd iteration:																	3rd iteration:
i	dose	n	r	p*	p0	y0		j=4	x	Y	P	z	y	w	nw	nwx	nwy	nw(x-`x)2	nw(y-ȳ)2	nw(x-`x)(y-ȳ)	χ2	Residual	Std. Res		j=4	x	Y	P	z	y	w	nw	nwx	nwy	nw(x-`x)2	nw(y-ȳ)2	nw(x-`x)(y-ȳ)	χ2	Residual	Std. Res		j=4	x	Y	P	z	y	w	nw
C	0	30	0	0	-	-			-																	-																	-
1	2	48	12	0.25	0.25	-0.67449			0.30103	-0.815528	0.207385	0.286081	-0.666567	0.497894	23.8989	7.1943	-15.9302	3.17679	15.0299	-5.70529	0.530302	2.04551	0.728219			0.30103	-0.82069	0.205911	0.284875	-0.665925	0.496317	23.8232	7.17151	-15.8645	3.18524	15.0625	-5.70241	0.57062	2.11626	0.755394			0.30103	-0.820589	0.20594	0.284899	-0.665938	0.496348	23.8247
2	3	50	15	0.3	0.3	-0.524401			0.477121	-0.356165	0.360858	0.374424	-0.518704	0.607847	30.3924	14.5008	-15.7646	1.07989	12.6505	-9.35545	0.802927	-3.04292	-0.896062			0.477121	-0.363231	0.358216	0.373474	-0.519108	0.606718	30.3359	14.4739	-15.7476	1.0901	12.7512	-9.38388	0.737099	-2.91082	-0.858544			0.477121	-0.36318	0.358235	0.373481	-0.519106	0.606726	30.3363
3	5	50	31	0.62	0.62	0.305481			0.69897	0.222563	0.588062	0.389183	0.304627	0.625249	31.2624	21.8515	9.52337	0.0347708	0.992351	3.89316	0.210537	1.5969	0.458844			0.69897	0.213101	0.584376	0.389986	0.304448	0.626188	31.3094	21.8843	9.53209	0.0326352	0.961323	3.83469	0.261256	1.78121	0.511133			0.69897	0.213086	0.58437	0.389987	0.304448	0.62619	31.3095
4	7	48	31	0.645833	0.645833	0.374095			0.845098	0.603761	0.726999	0.332471	0.359633	0.556941	26.7332	22.5922	9.61415	0.861139	1.45345	5.26784	1.59325	-3.89594	-1.26224			0.845098	0.59272	0.723316	0.334674	0.361204	0.559671	26.8642	22.7029	9.70346	0.855123	1.44571	5.26665	1.43991	-3.71916	-1.19996			0.845098	0.592663	0.723297	0.334686	0.361212	0.559685	26.8649
5	10	59	52	0.881356	0.881356	1.18179			1	1.00785	0.843236	0.240072	1.16663	0.436001	25.7241	25.7241	30.0105	2.87621	27.8322	26.7574	0.648569	2.24906	0.805338			1	0.995134	0.840164	0.243148	1.16454	0.440255	25.975	25.975	30.2491	2.8858	27.8423	26.8925	0.745471	2.4303	0.863407			1	0.99503	0.840139	0.243173	1.16453	0.44029	25.9771
6
7
8
9
10
								Sum							138.011	91.8629	17.4532	8.0288	57.9585	20.8577	3.78559				Sum	-1.14328						138.308	92.2077	17.8725	8.04891	58.063	20.9075	3.75436				Sum	-1.13007						138.312
								Mean	0.66562				0.126462												Mean	0.666685				0.129223												Mean	0.666686				0.129225
	Provisional regression line:							Working probit regression line:											Comparison of two slopes:						Working probit regression line:											Comparison of two slopes:						Working probit regression line:
	β0	α0	R2	F	d.f.Res	p for F		β	α	σ(β)	σ(α)	z for β	z for α	d.f.	p for χ2	h	g		z of b14	Parallel of	Bactimo-Aedes	vs	Fairfax		β	α	σ(β)	σ(α)	z for β	z for α	d.f.	p for χ2	h	g		z of b14	Parallel of	Bactimo-Aedes	vs	Fairfax		β	α	σ(β)	σ(α)	z for β	z for α	d.f.	p for χ2
	2.60866	-1.60081	0.93923	5.15181	3	0.107949		2.59786	-1.60272	0.352919	0.249857	7.36106	-6.41457	3	0.285567	1.26186	0.0708975		3.85062	No					2.59756	-1.60253	0.352478	0.249902	7.36944	-6.41264	3	0.28924	1.25145	0.0707364		3.78663	No					2.59756	-1.60253	0.352468	0.249896	7.36965	-6.4128	3	0.289267
															LDπ:				Comparison of LDπs:													LDπ:				Comparison of LDπs:													LDπ:
															Fairfax					Bactimo-Aedes	vs	Fairfax										Fairfax					Bactimo-Aedes	vs	Fairfax										Fairfax
												95%CL	of θ4			95%CLs	of LDπ4					95%CLs	of ratio14						95%CL	of θ4			95%CLs	of LDπ4					95%CLs	of ratio14						95%CL	of θ4
								π	yπ	θ4	σ(θ4)	Lower	Upper	π	LDπ2	Lower	Upper		θ14	σ(θ14)	Ratio14	Lower	Upper		π	yπ	θ4	σ(θ4)	Lower	Upper	π	LDπ2	Lower	Upper		θ14	σ(θ14)	Ratio14	Lower	Upper		π	yπ	θ4	σ(θ4)	Lower	Upper	π	LDπ2
								10	-1.28155	0.12363	0.0805911	-0.132847	0.380106	10	1.32932	0.736466	2.39942		-2.78832	0.209418	0.00162809	0.000632732	0.00418927		10	-1.28155	0.12357	0.0806411	-0.133066	0.380206	10	1.32914	0.736096	2.39997		-2.78622	0.216499	0.00163599	0.000615805	0.00434628		10	-1.28155	0.12357	0.0806391	-0.133059	0.3802	10	1.32914
								50	0	0.616941	0.033427	0.510561	0.72332	50	4.13943	3.24012	5.28835		-2.14521	0.117201	0.00715802	0.00421774	0.012148		50	0	0.616937	0.0334237	0.510568	0.723306	50	4.1394	3.24017	5.28818		-2.15191	0.119972	0.00704844	0.00410155	0.0121126		50	0	0.616937	0.0334231	0.51057	0.723305	50	4.1394
								90	1.28155	1.11025	0.0687181	0.89156	1.32894	90	12.89	7.7904	21.3277		-1.50209	0.188919	0.0314707	0.0134161	0.0738223		90	1.28155	1.1103	0.068522	0.892236	1.32837	90	12.8915	7.80254	21.2996		-1.51759	0.198537	0.0303672	0.0123958	0.0743939		90	1.28155	1.1103	0.0685201	0.892243	1.32837	90	12.8915
								99	2.32635	1.51243	0.119614	1.13176	1.89309	99	32.5408	13.5445	78.1796		-0.97779	0.303515	0.105247	0.0267498	0.414095		99	2.32635	1.51253	0.119354	1.13269	1.89236	99	32.5481	13.5734	78.048		-1.00047	0.319947	0.0998928	0.0235742	0.423283		99	2.32635	1.51253	0.11935	1.1327	1.89235	99	32.5481
[truncated: 280 more columns]
